# Supplementary material for: Opportunities in upgrading biomass crudes
Source: Royal Society of Chemistry journal article supplement (doi:10.1039/c6fd00208k), 2016-10-25
Supplement: c6fd00208k1.pdf [file c6fd00208k1.pdf]

## Opportunities in Upgrading Biomass and Extra-Heavy Fossil Crudes

Y. Mathieu,<sup>[a]</sup> L.Sauvanaud,<sup>[a]</sup> L. Humphreys,<sup>[b]</sup> W. Rowland,<sup>[b]</sup> T. Maschmeyer<sup>[c]</sup> and A. Corma<sup>\*[a]</sup>

### Supplementary information

Figure S1. SIMDIS of biocrude and chromatographic comparison of petroleum based Straight Run Gas Oil (SRGO, diesel) and Vacuum Gas Oil (VGO, FCC feed)

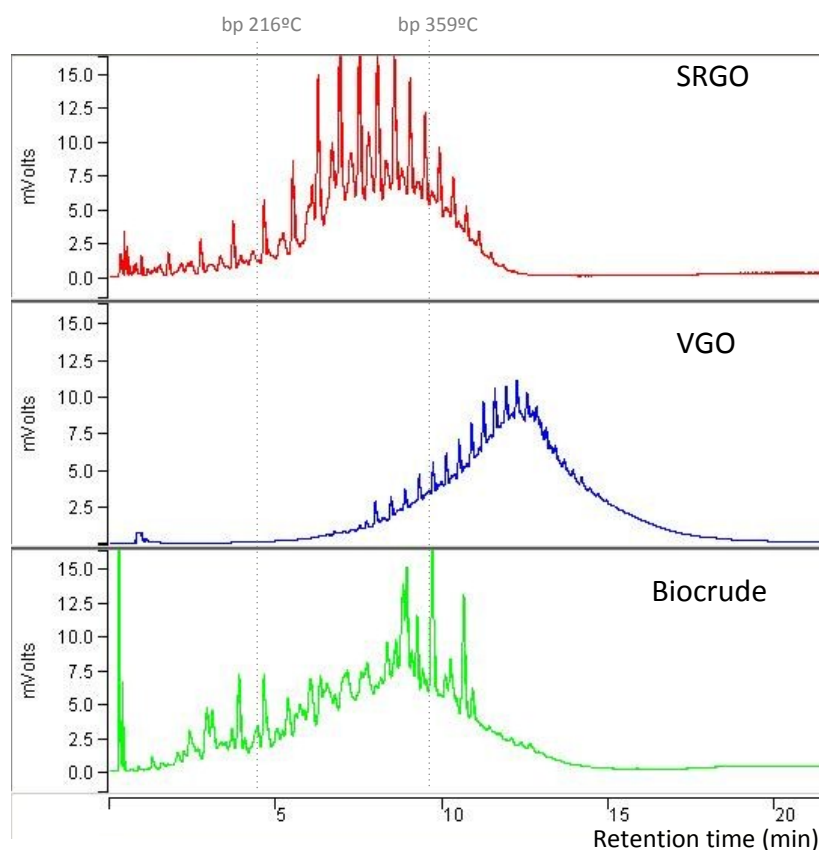

Figure S2. Fixed bed hydrotreating system flow chart

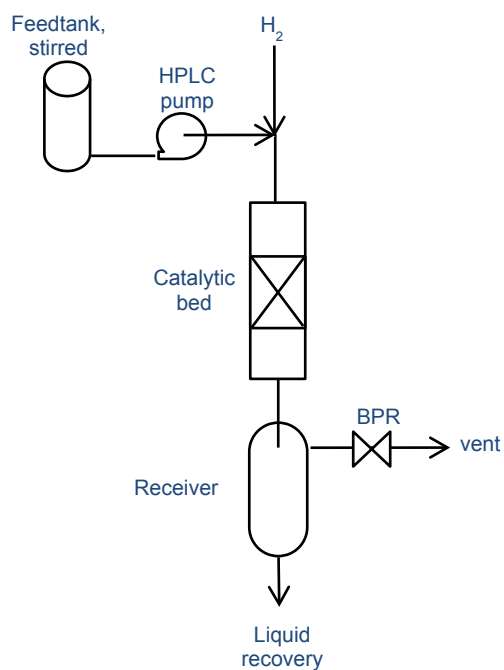

Figure S3. GCxGC plots of Hydrotreated Biocrude Heavies (HBH)

a) 2D plot

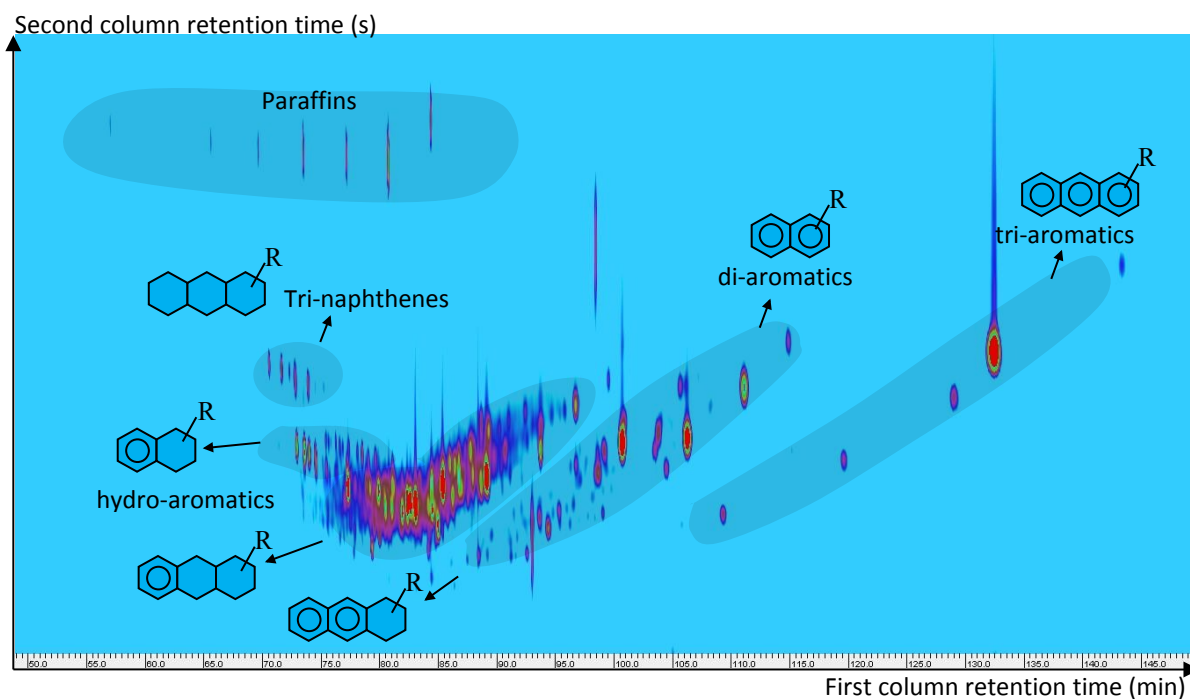

b) 3D plot

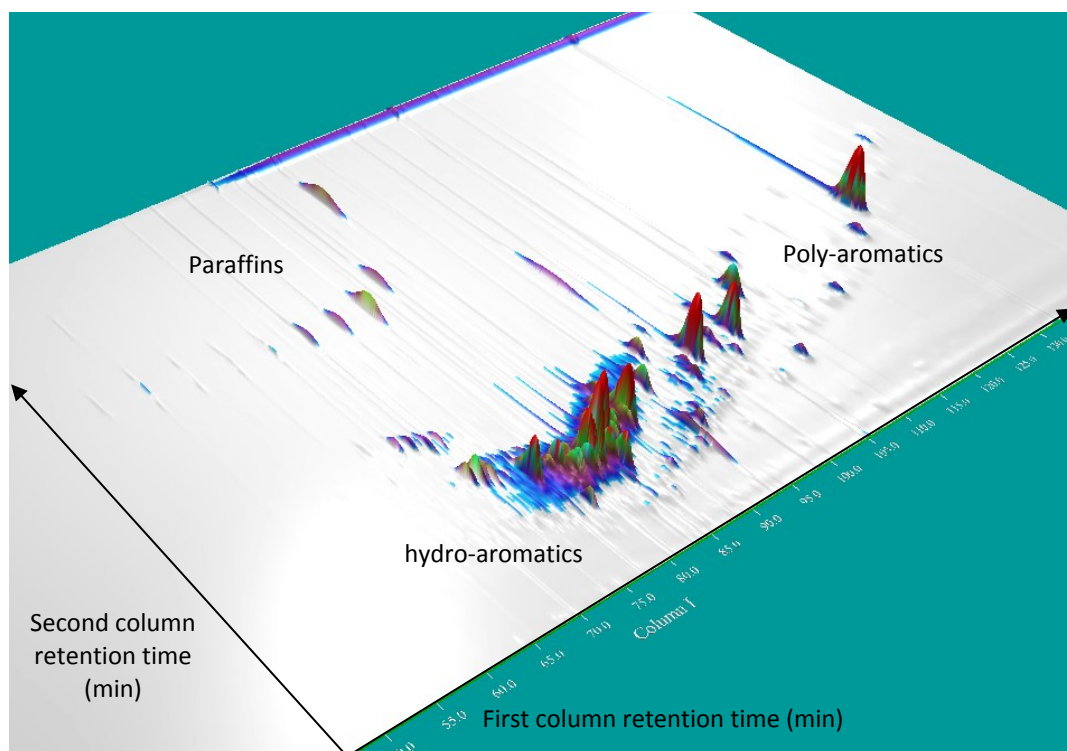

Table S1. Elemental Analysis of Biocrude

| Element           | wt%  |
|-------------------|------|
| C                 | 78.5 |
| H                 | 8.9  |
| N                 | 0.2  |
| S                 | 0.0  |
| O (by difference) | 12.4 |
